# Supplementary material for: Carbon dots based turn-on fluorescent probes for oxytetracycline hydrochloride sensing
Source: Royal Society of Chemistry journal article supplement (doi:10.1039/c4ra16456c), 2015-01-01
Supplement: c4ra16456c1.pdf [file c4ra16456c1.pdf]

## Supplementary Information

### **Carbon dots based turn-on fluorescent probes for oxytetracycline hydrochloride sensing**

Xuting An, Shujuan Zhuo\*, Ping Zhang and Changqing Zhu\*

Key Laboratory of Functional Molecular Solids, Ministry of Education; Anhui Key Laboratory of Chemo-Biosensing, College of Chemistry and Materials Science, Anhui Normal University, Wuhu, 241000, PR China

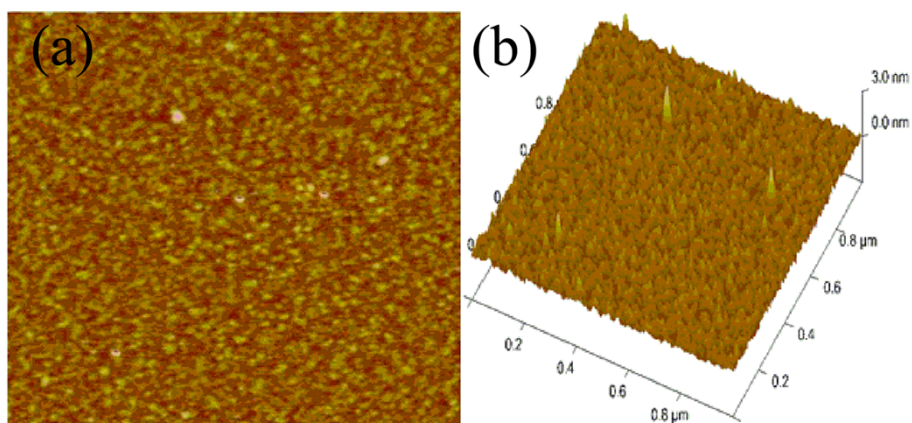

**Fig. S1** (a) AFM image of as-prepared CDs; and (b) Tapping mode AFM image ( $0.8\ \mu\text{m} \times 0.8\ \mu\text{m}$ ) of the CDs.

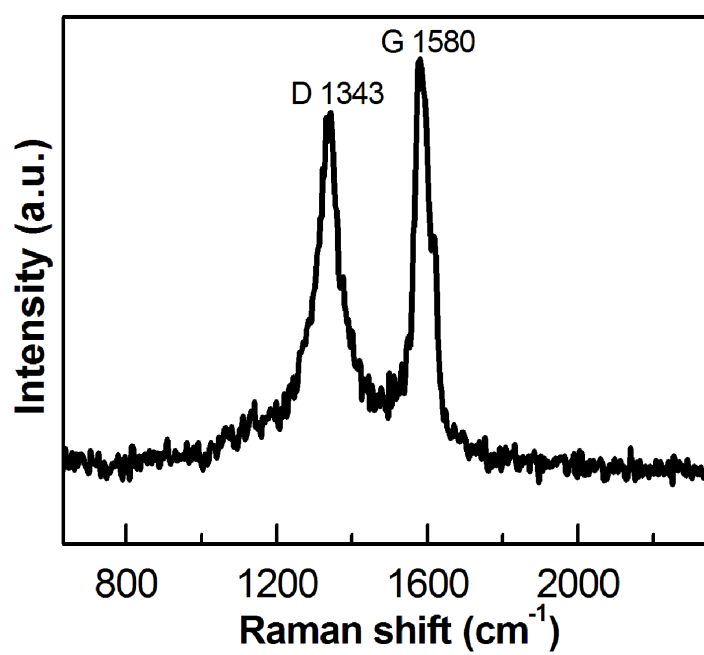

**Fig. S2** Raman spectrum of the as-prepared CDs.

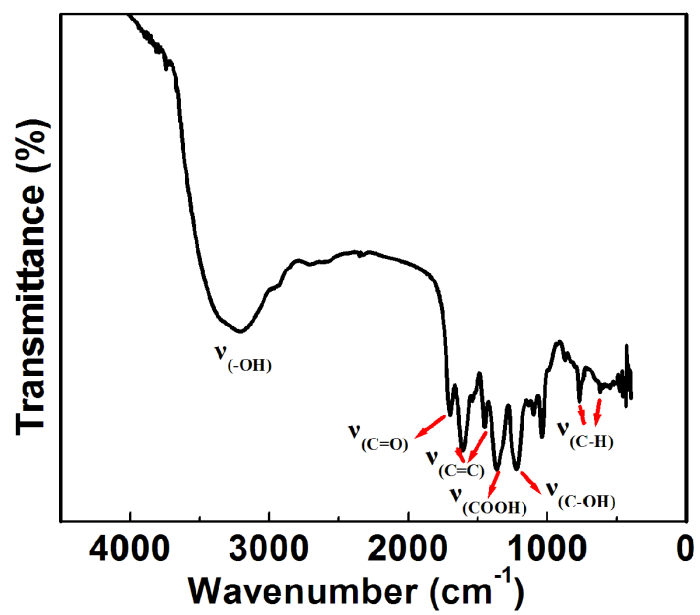

**Fig. S3** FT-IR spectrum of the CDs.

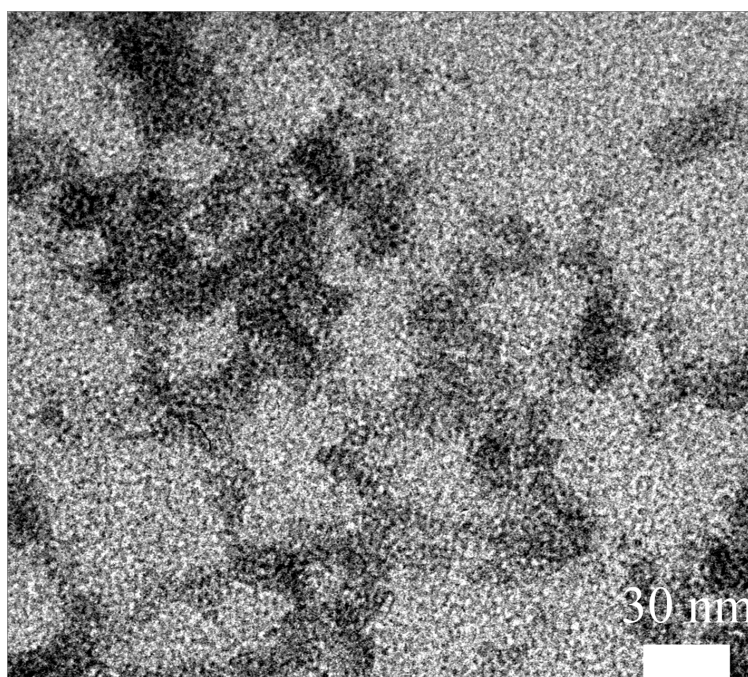

**Fig. S4** TEM image of the CDs in the presence of  $\text{Fe}^{3+}$ .

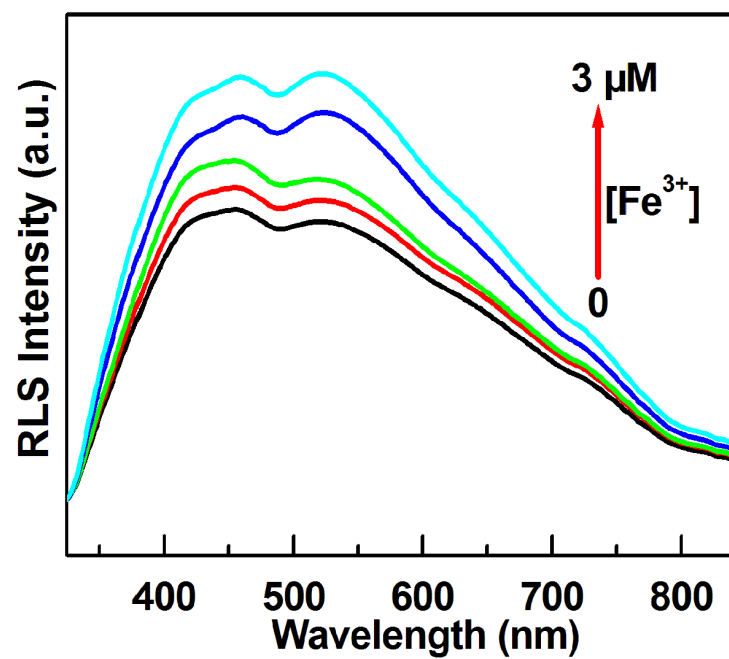

Fig. S5 RLS spectra of the CDs containing different concentrations of  $\text{Fe}^{3+}$ .

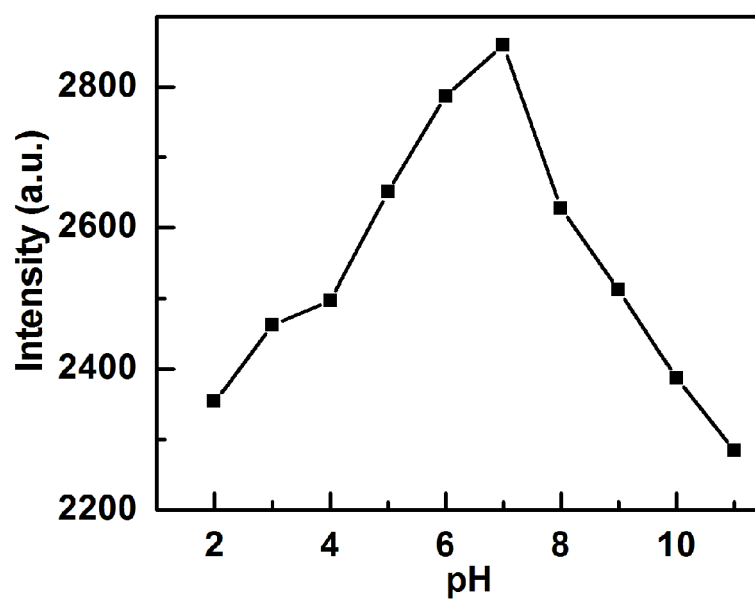

Fig. S6 Effect of pH on the fluorescence intensity of the CDs.

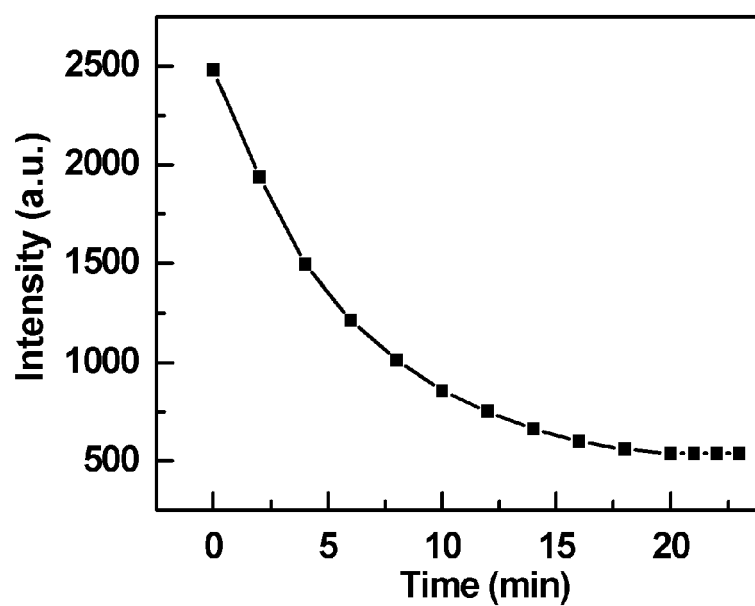

**Fig. S7** Effect of incubation time on the fluorescence intensity of the CDs-Fe<sup>3+</sup> system.

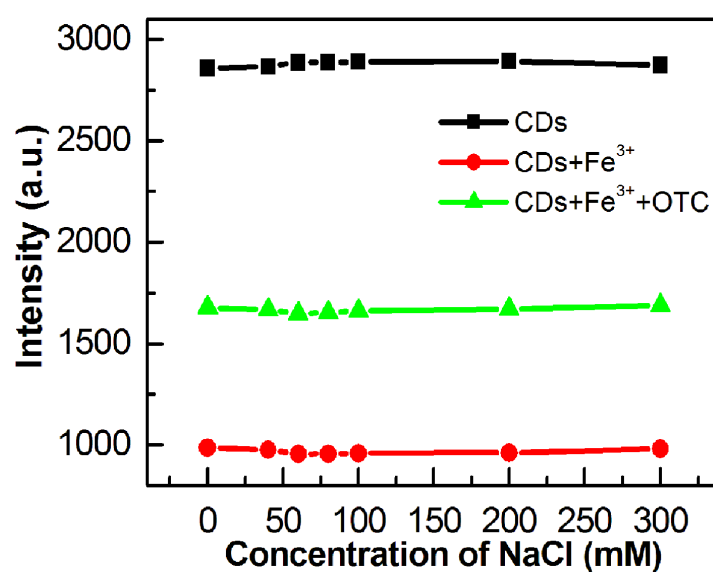

**Fig. S8** Effect of ionic strength on the fluorescence signals of the CDs, CDs-Fe<sup>3+</sup> and CDs-Fe<sup>3+</sup>-OTC. Concentration: Fe<sup>3+</sup>, 5  $\mu$ M; OTC, 2.7  $\mu$ M.

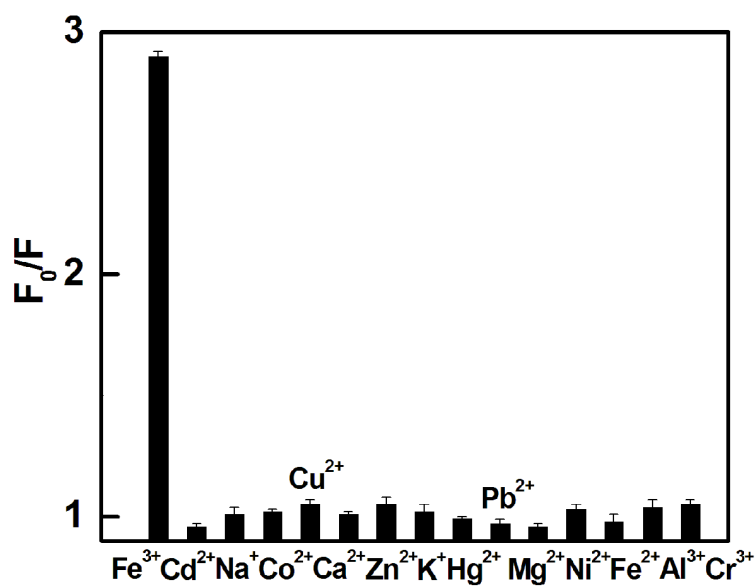

**Fig. S9** Selectivity of the  $\text{Fe}^{3+}$  sensor. The concentration of all interference metal ions were 14  $\mu\text{M}$ .  $F_0$  and  $F$  are fluorescence intensities of the CDs in the absence and presence of the various metal ions, respectively. The error bars represent the standard deviation of three measurements.
